# Supplementary material for: SrMGe2O6 (M = Mn, Co): a family of pyroxene compounds displaying multiferroicity
Source: Royal Society of Chemistry journal article supplement (doi:10.1039/c6tc00149a), 2016-01-01
Supplement: c6tc00149a1.pdf [file c6tc00149a1.pdf]

## SrMGe<sub>2</sub>O<sub>6</sub> (M=Mn, Co): a new family of pyroxene compounds displaying multiferroicity

Lei Ding,<sup>1,2</sup> Claire V. Colin,<sup>1,2</sup> Céline Darie<sup>1,2</sup> and Pierre Bordet<sup>\*,1,2</sup>

<sup>1</sup>Univ. Grenoble Alpes, Inst NEEL, F-38042 Grenoble, France

<sup>2</sup>CNRS, Inst NEEL, F-38042 Grenoble, France

Table S1. Agreement factors and refined structural parameters for SrMnGe<sub>2</sub>O<sub>6</sub> at 300 K.

| Name | Method               | Position              | x                      | y                      | z                        | B(Å <sup>2</sup> ) |
|------|----------------------|-----------------------|------------------------|------------------------|--------------------------|--------------------|
| Sr   | XSCD                 | 4e                    | 0.0                    | 0.30818(3)             | 0.25                     | 0.645(6)           |
|      | NPD                  | 4e                    | 0.0                    | 0.3094(6)              | 0.25                     | 0.9(1)             |
| Mn   | XSCD                 | 4e                    | 0.0                    | 0.90713(5)             | 0.25                     | 0.524(11)          |
|      | NPD                  | 4e                    | 0.0                    | 0.905(1)               | 0.25                     | 0.3(2)             |
| Ge   | XSCD                 | 8f                    | 0.28249(3)             | 0.09515(3)             | 0.21800(5)               | 0.410(6)           |
|      | NPD                  | 8f                    | 0.2820(3)              | 0.0965(3)              | 0.2201(6)                | 0.30(6)            |
| O1   | XSCD                 | 8f                    | 0.1110(2)              | 0.0870(2)              | 0.1388(4)                | 0.58(4)            |
|      | NPD                  | 8f                    | 0.11109(4)             | 0.0828(5)              | 0.1394(8)                | 0.72(8)            |
| O2   | XSCD                 | 8f                    | 0.3574(2)              | 0.2543(2)              | 0.3158(4)                | 0.88(4)            |
|      | NPD                  | 8f                    | 0.3559(4)              | 0.2551(4)              | 0.3155(8)                | 0.71(8)            |
| O3   | XSCD                 | 8f                    | 0.3534(2)              | 0.0217(2)              | 0.9805(3)                | 0.62(4)            |
|      | NPD                  | 8f                    | 0.3530(3)              | 0.0215(5)              | 0.9827(9)                | 0.36(8)            |
| XSCD | A=10.346(2)          | B=9.420(2)            | C=5.511(1)             | Beta=104.669(5)        |                          |                    |
| NPD  | A=10.3511(6)         | B=9.4204(5)           | C=5.5093(3)            | Beta=104.700(2)        |                          |                    |
| NPD  | R <sub>p</sub> =3.19 | R <sub>wp</sub> =4.28 | R <sub>exp</sub> =0.50 | Chi <sup>2</sup> =74.6 | R <sub>Bragg</sub> =5.28 |                    |

Harmonic atomic displacement parameters (Å<sup>2</sup>) from XSCD for SrMnGe<sub>2</sub>O<sub>6</sub> at 300 K

| Atom | U11         | U22         | U33         | U12         | U13         | U23         |
|------|-------------|-------------|-------------|-------------|-------------|-------------|
| Sr   | 0.01024(15) | 0.00625(11) | 0.00727(15) | 0           | 0.00084(11) | 0           |
| Mn   | 0.0072(2)   | 0.00644(19) | 0.0059(2)   | 0           | 0.00096(18) | 0           |
| Ge   | 0.00489(12) | 0.00539(10) | 0.00542(13) | -0.00045(7) | 0.00154(9)  | -0.00039(7) |
| O1   | 0.0044(7)   | 0.0087(6)   | 0.0089(8)   | 0.0004(5)   | 0.0013(6)   | 0.0003(6)   |
| O2   | 0.0140(9)   | 0.0080(7)   | 0.0107(9)   | -0.0050(6)  | 0.0020(7)   | -0.0006(6)  |
| O3   | 0.0080(8)   | 0.0095(7)   | 0.0064(8)   | -0.0005(5)  | 0.0029(6)   | -0.0026(5)  |

Table S2. Agreement factors and refined structural parameters for SrCoGe<sub>2</sub>O<sub>6</sub> at 300 K with NPD using wavelength of 1.28 Å.

| Name                                                                                                                          | Position | x         | y         | z         | B(Å <sup>2</sup> ) |
|-------------------------------------------------------------------------------------------------------------------------------|----------|-----------|-----------|-----------|--------------------|
| Sr                                                                                                                            | 4e       | 0.0       | 0.3050(3) | 0.25      | 0.54(5)            |
| Co                                                                                                                            | 4e       | 0.0       | 0.9099(9) | 0.25      | 0.9(1)             |
| Ge                                                                                                                            | 8f       | 0.2820(2) | 0.0963(2) | 0.2087(3) | 0.34(3)            |
| O1                                                                                                                            | 8f       | 0.1083(2) | 0.0825(3) | 0.1318(4) | 0.40(4)            |
| O2                                                                                                                            | 8f       | 0.3547(2) | 0.2602(2) | 0.3055(4) | 0.69(4)            |
| O3                                                                                                                            | 8f       | 0.3553(2) | 0.0191(2) | 0.9788(4) | 0.52(6)            |
| a=10.2560(1)Å    b=9.2970(1)Å    c=5.4701(1)Å    β=105.588(1)°                                                                |          |           |           |           |                    |
| R <sub>p</sub> =1.72    R <sub>wp</sub> =2.28    R <sub>exp</sub> =0.30    Chi <sup>2</sup> =55.9    R <sub>Bragg</sub> =2.51 |          |           |           |           |                    |
